# Supplementary material for: TMT-based proteomic analysis of the causes of reduced seed viability in Allium mongolicum under accelerated aging
Source: Research Square preprint supplement (doi:10.21203/rs.3.rs-2216220/v1), 2022-11-29
Supplement: Supplementary file 1 [file 7e3848d439a26f31ebc8f2e0.xlsx]

## Sheet: T1.vs.CK.
GO enrichment analysis of DEPs under aged A.mongolicum seeds of ‘T1 vs. CK’
GO_ID	GO_Term	GO_Class	Pvalue	AdjustedPv	Up_Prot_names	Down_Prot_names
GO:0016846	carbon-sulfur lyase activity	MF	2.18862e-05	0.0034799	Unigene0003943 Unigene0063658 Unigene0012164
GO:0004857	enzyme inhibitor activity	MF	0.00810261	0.568738		Unigene0005112 Unigene0015233
GO:0003989	acetyl-CoA carboxylase activity	MF	0.031961	0.568738		Unigene0064779
GO:0004867	serine-type endopeptidase inhibitor activity	MF	0.031961	0.568738		Unigene0005112
GO:0009611	response to wounding	BP	0.031961	0.568738		Unigene0005112
GO:0007034	vacuolar transport	BP	0.0423941	0.568738		Unigene0042292
GO:0008171	O-methyltransferase activity	MF	0.0423941	0.568738	Unigene0042829
GO:0006633	fatty acid biosynthetic process	BP	0.0527187	0.568738		Unigene0064779
GO:0012511	monolayer-surrounded lipid storage body	CC	0.0929539	0.568738		Unigene0011542
GO:0006629	lipid metabolic process	BP	0.0930666	0.568738	Unigene0059120	Unigene0064779
GO:0003993	acid phosphatase activity	MF	0.102752	0.568738		Unigene0010352
GO:0000786	nucleosome	CC	0.112448	0.568738	Unigene0049278
GO:0006468	protein phosphorylation	BP	0.138787	0.568738		Unigene0053916 Unigene0045171
GO:0046983	protein dimerization activity	MF	0.140935	0.568738	Unigene0042829
GO:0004672	protein kinase activity	MF	0.146218	0.568738		Unigene0053916 Unigene0045171
GO:0006334	nucleosome assembly	BP	0.150233	0.568738	Unigene0049278
GO:0005515	protein binding	MF	0.188699	0.646884	Unigene0060546 Unigene0048082 Unigene0042829	Unigene0006910 Unigene0000863 Unigene0051938 Unigene0053916
GO:0016021	integral component of membrane	CC	0.284838	0.668153	Unigene0001955	Unigene0011542
GO:0005506	iron ion binding	MF	0.286439	0.668153	Unigene0050964
GO:0005524	ATP binding	MF	0.354453	0.699217	Unigene0060546	Unigene0064779 Unigene0053916 Unigene0045171
GO:0003677	DNA binding	MF	0.384977	0.705386	Unigene0049278	Unigene0028772
GO:0020037	heme binding	MF	0.394839	0.705386	Unigene0050964
GO:0005215	transporter activity	MF	0.408033	0.710406		Unigene0005503
GO:0016192	vesicle-mediated transport	BP	0.452061	0.756608	Unigene0001955
GO:0016020	membrane	CC	0.478781	0.776797	Unigene0001955	Unigene0005503 Unigene0011542
GO:0006810	transport	BP	0.49202	0.777671	Unigene0001955	Unigene0042292 Unigene0005503
GO:0050662	coenzyme binding	MF	0.520295	0.777671		Unigene0045869
GO:0005634	nucleus	CC	0.589567	0.860011	Unigene0049278
GO:0043232	intracellular non-membrane-bounded organelle	CC	0.65066	0.923705	Unigene0049278	Unigene0011542
GO:0016740	transferase activity	MF	0.746082	0.944995	Unigene0042829	Unigene0053916 Unigene0045171
GO:0055114	oxidation-reduction process	BP	0.750874	0.944995	Unigene0059120 Unigene0050964	Unigene0049013
GO:0003824	catalytic activity	MF	0.951424	1	Unigene0003943 Unigene0063658 Unigene0012164 Unigene0042829	Unigene0049013 Unigene0047137 Unigene0045869 Unigene0064779 Unigene0053916 Unigene0045171 Unigene0010352
GO:0005488	binding	MF	1	1	Unigene0049278 Unigene0060546 Unigene0048082 Unigene0042829 Unigene0050964	Unigene0006910 Unigene0045869 Unigene0064779 Unigene0000863 Unigene0051938 Unigene0047075 Unigene0028772 Unigene0053916 Unigene0045171 Unigene0010352
Note: GO_ID : GO identification number; GO_Term:Description of the GO identifier function；GO_Class：GO Category (MF,CC,BP)；Pvalue:Pvalue of enrichment analysis; AdjustedPv:corrected Pvalue.

## Sheet: T4.vs.CK.
GO enrichment analysis of DEPs under aged A.mongolicum seeds of ‘T4 vs. CK’
GO_ID	GO_Term	GO_Class	Pvalue	AdjustedPv	Up_Prot_names	Down_Prot_names
GO:0009790	embryo development	BP	0.000958211	0.110031		Unigene0016537 Unigene0037631
GO:0012511	monolayer-surrounded lipid storage body	CC	0.00213502	0.110031		Unigene0037206 Unigene0042398 Unigene0011542
GO:0003993	acid phosphatase activity	MF	0.00298187	0.110031	Unigene0050296	Unigene0008805 Unigene0010352
GO:0016788	hydrolase activity, acting on ester bonds	MF	0.00840679	0.28201	Unigene0050296	Unigene0053147 Unigene0043921 Unigene0008805 Unigene0013829 Unigene0010352
GO:0043232	intracellular non-membrane-bounded organelle	CC	0.0197453	0.464223	Unigene0036636 Unigene0035959 Unigene0065241 Unigene0035780 Unigene0045590	Unigene0037206 Unigene0049278 Unigene0042398 Unigene0011542
GO:0004519	endonuclease activity	MF	0.0299202	0.464223		Unigene0053147 Unigene0043921
GO:0004019	adenylosuccinate synthase activity	MF	0.0311419	0.464223		Unigene0059582
GO:0006672	ceramide metabolic process	BP	0.0311419	0.464223	Unigene0055579
GO:0020037	heme binding	MF	0.0529291	0.464223	Unigene0079035 Unigene0010241	Unigene0050520 Unigene0050586
GO:0004455	ketol-acid reductoisomerase activity	MF	0.0613255	0.464223	Unigene0055248
GO:0009082	branched-chain amino acid biosynthetic process	BP	0.0613255	0.464223	Unigene0055248
GO:0009415	response to water	BP	0.0613255	0.464223		Unigene0051222
GO:0004813	alanine-tRNA ligase activity	MF	0.0613255	0.464223	Unigene0064328
GO:0006419	alanyl-tRNA aminoacylation	BP	0.0613255	0.464223	Unigene0064328
GO:0006979	response to oxidative stress	BP	0.0684228	0.464223		Unigene0050520 Unigene0050586
GO:0004252	serine-type endopeptidase activity	MF	0.0773951	0.464223		Unigene0025007 Unigene0062435
GO:0008236	serine-type peptidase activity	MF	0.0813185	0.464223		Unigene0025007 Unigene0037023 Unigene0062435
GO:0006452	translational frameshifting	BP	0.0905801	0.464223	Unigene0010057
GO:0045901	positive regulation of translational elongation	BP	0.0905801	0.464223	Unigene0010057
GO:0045905	positive regulation of translational termination	BP	0.0905801	0.464223	Unigene0010057
GO:0006308	DNA catabolic process	BP	0.0905801	0.464223		Unigene0053147
GO:0004867	serine-type endopeptidase inhibitor activity	MF	0.0905801	0.464223		Unigene0005112
GO:0009611	response to wounding	BP	0.0905801	0.464223		Unigene0005112
GO:0033897	ribonuclease T2 activity	MF	0.0905801	0.464223		Unigene0043921
GO:0004601	peroxidase activity	MF	0.0963516	0.487038		Unigene0050520 Unigene0050586
GO:0007034	vacuolar transport	BP	0.118934	0.548582		Unigene0042292
GO:0008171	O-methyltransferase activity	MF	0.118934	0.548582	Unigene0042829
GO:0043603	cellular amide metabolic process	BP	0.131602	0.585074	Unigene0010057 Unigene0036636 Unigene0035959 Unigene0055579 Unigene0065241 Unigene0035780 Unigene0064328 Unigene0045590
GO:0043022	ribosome binding	MF	0.146414	0.628219	Unigene0010057
GO:0006950	response to stress	BP	0.153714	0.651959		Unigene0050520 Unigene0051222 Unigene0005112 Unigene0050586
GO:0003860	3-hydroxyisobutyryl-CoA hydrolase activity	MF	0.173048	0.658294		Unigene0013829
GO:0006629	lipid metabolic process	BP	0.18653	0.686435	Unigene0055579	Unigene0016681 Unigene0000649
GO:0016157	sucrose synthase activity	MF	0.19886	0.686435		Unigene0063235
GO:0006412	translation	BP	0.199047	0.686435	Unigene0010057 Unigene0036636 Unigene0035959 Unigene0065241 Unigene0035780 Unigene0064328 Unigene0045590
GO:0005840	ribosome	CC	0.214832	0.707793	Unigene0036636 Unigene0035959 Unigene0065241 Unigene0035780 Unigene0045590
GO:0003735	structural constituent of ribosome	MF	0.218468	0.712158	Unigene0036636 Unigene0035959 Unigene0065241 Unigene0035780 Unigene0045590
GO:0005985	sucrose metabolic process	BP	0.223876	0.712158		Unigene0063235
GO:0009055	electron carrier activity	MF	0.227787	0.712316	Unigene0079035	Unigene0006158
GO:0071822	protein complex subunit organization	BP	0.227787	0.712316	Unigene0010057	Unigene0049278
GO:0003746	translation elongation factor activity	MF	0.248121	0.73836	Unigene0010057
GO:0045735	nutrient reservoir activity	MF	0.271617	0.783021	Unigene0060564
GO:0000786	nucleosome	CC	0.294388	0.80466		Unigene0049278
GO:0008168	methyltransferase activity	MF	0.321224	0.846655	Unigene0042829 Unigene0057431
GO:0046983	protein dimerization activity	MF	0.358565	0.846796	Unigene0042829
GO:0006334	nucleosome assembly	BP	0.378649	0.846796		Unigene0049278
GO:1901566	organonitrogen compound biosynthetic process	BP	0.476966	0.972315	Unigene0055248 Unigene0010057 Unigene0036636 Unigene0035959 Unigene0065241 Unigene0035780 Unigene0064328 Unigene0045590	Unigene0059582
GO:0044271	cellular nitrogen compound biosynthetic process	BP	0.501842	0.972315	Unigene0010057 Unigene0036636 Unigene0035959 Unigene0065241 Unigene0035780 Unigene0064328 Unigene0045590	Unigene0059582
GO:0006164	purine nucleotide biosynthetic process	BP	0.533605	0.972315		Unigene0059582
GO:0008233	peptidase activity	MF	0.535792	0.972315		Unigene0025007 Unigene0062603 Unigene0037023 Unigene0062435
GO:0016021	integral component of membrane	CC	0.545916	0.972315	Unigene0055579	Unigene0037206 Unigene0042398 Unigene0011542
GO:0006508	proteolysis	BP	0.551575	0.972315		Unigene0025007 Unigene0062603 Unigene0037023 Unigene0062435
GO:0015992	proton transport	BP	0.576232	0.972315	Unigene0024535
GO:1901564	organonitrogen compound metabolic process	BP	0.581766	0.972315	Unigene0055248 Unigene0010057 Unigene0024535 Unigene0036636 Unigene0035959 Unigene0055579 Unigene0065241 Unigene0035780 Unigene0064328 Unigene0045590	Unigene0059582
GO:0050896	response to stimulus	BP	0.591653	0.972315	Unigene0039209	Unigene0050520 Unigene0051222 Unigene0005112 Unigene0050586
GO:0019538	protein metabolic process	BP	0.596548	0.97401	Unigene0010057 Unigene0036636 Unigene0035959 Unigene0065241 Unigene0035780 Unigene0064328 Unigene0045590	Unigene0025007 Unigene0062603 Unigene0037023 Unigene0053916 Unigene0045171 Unigene0062435
GO:0005975	carbohydrate metabolic process	BP	0.616776	0.989523	Unigene0073932 Unigene0013554 Unigene0008772	Unigene0063235 Unigene0023668
GO:0044238	primary metabolic process	BP	0.676943	1	Unigene0010057 Unigene0024535 Unigene0073932 Unigene0013554 Unigene0036636 Unigene0035959 Unigene0055579 Unigene0065241 Unigene0008772 Unigene0035780 Unigene0064328 Unigene0045590	Unigene0063235 Unigene0025007 Unigene0023668 Unigene0062603 Unigene0053147 Unigene0059582 Unigene0016681 Unigene0037023 Unigene0053916 Unigene0045171 Unigene0000649 Unigene0062435
GO:0016787	hydrolase activity	MF	0.682523	1	Unigene0050296	Unigene0025007 Unigene0042637 Unigene0062603 Unigene0053147 Unigene0043921 Unigene0037023 Unigene0008805 Unigene0013829 Unigene0062435 Unigene0010352
GO:0006163	purine nucleotide metabolic process	BP	0.693069	1	Unigene0024535	Unigene0059582
GO:0016874	ligase activity	MF	0.706184	1	Unigene0064328	Unigene0059582
GO:0006468	protein phosphorylation	BP	0.715048	1		Unigene0053916 Unigene0045171
GO:0005525	GTP binding	MF	0.744881	1	Unigene0063008 Unigene0039209	Unigene0059582
GO:0003676	nucleic acid binding	MF	0.797631	1	Unigene0010057 Unigene0024647 Unigene0034295 Unigene0060546 Unigene0011562 Unigene0056897 Unigene0045768 Unigene0064328	Unigene0048384 Unigene0049278 Unigene0053147 Unigene0043921 Unigene0011452 Unigene0047075
GO:0071704	organic substance metabolic process	BP	0.805923	1	Unigene0055248 Unigene0010057 Unigene0024535 Unigene0073932 Unigene0013554 Unigene0036636 Unigene0035959 Unigene0055579 Unigene0065241 Unigene0008772 Unigene0035780 Unigene0064328 Unigene0045590	Unigene0063235 Unigene0025007 Unigene0023668 Unigene0062603 Unigene0053147 Unigene0059582 Unigene0016681 Unigene0037023 Unigene0053916 Unigene0045171 Unigene0000649 Unigene0062435
GO:0034641	cellular nitrogen compound metabolic process	BP	0.914154	1	Unigene0010057 Unigene0024535 Unigene0036636 Unigene0035959 Unigene0055579 Unigene0065241 Unigene0035780 Unigene0064328 Unigene0045590	Unigene0053147 Unigene0059582
GO:0043170	macromolecule metabolic process	BP	1	1	Unigene0010057 Unigene0036636 Unigene0035959 Unigene0065241 Unigene0035780 Unigene0064328 Unigene0045590	Unigene0025007 Unigene0062603 Unigene0053147 Unigene0037023 Unigene0053916 Unigene0045171 Unigene0062435
GO:0005515	protein binding	MF	1	1	Unigene0053330 Unigene0060546 Unigene0055999 Unigene0048082 Unigene0003487 Unigene0011562 Unigene0042829 Unigene0000890	Unigene0006910 Unigene0000863 Unigene0051938 Unigene0048604 Unigene0053916
GO:0044267	cellular protein metabolic process	BP	1	1	Unigene0010057 Unigene0036636 Unigene0035959 Unigene0065241 Unigene0035780 Unigene0064328 Unigene0045590	Unigene0053916 Unigene0045171
GO:0044249	cellular biosynthetic process	BP	1	1	Unigene0055248 Unigene0010057 Unigene0036636 Unigene0035959 Unigene0065241 Unigene0035780 Unigene0064328 Unigene0045590	Unigene0059582
GO:0006807	nitrogen compound metabolic process	BP	1	1	Unigene0055248 Unigene0010057 Unigene0024535 Unigene0036636 Unigene0035959 Unigene0055579 Unigene0065241 Unigene0035780 Unigene0064328 Unigene0045590	Unigene0053147 Unigene0059582
Note: GO_ID : GO identification number; GO_Term:Description of the GO identifier function；GO_Class：GO Category (MF,CC,BP)；Pvalue:Pvalue of enrichment analysis; AdjustedPv:corrected Pvalue.

## Sheet: T4.vs.T1.
GO enrichment analysis of DEPs under aged A.mongolicum seeds of ‘T4 vs. T1’
GO_ID	GO_Term	GO_Class	Pvalue	AdjustedPv	Up_Prot_names	Down_Prot_names
GO:0016846	carbon-sulfur lyase activity	MF	0.0002008	0.0534846		Unigene0003943 Unigene0063658 Unigene0012164
GO:0009790	embryo development	BP	0.000488865	0.0534846		Unigene0016537 Unigene0037631
GO:0020037	heme binding	MF	0.00315387	0.0933546	Unigene0079035 Unigene0010241	Unigene0050520 Unigene0050964 Unigene0050586
GO:0043232	intracellular non-membrane-bounded organelle	CC	0.00795296	0.196173	Unigene0036636 Unigene0035959 Unigene0065241 Unigene0035780 Unigene0045590 Unigene0072006	Unigene0037206 Unigene0049278
GO:0043603	cellular amide metabolic process	BP	0.0137096	0.312158	Unigene0036636 Unigene0035959 Unigene0055579 Unigene0065241 Unigene0035780 Unigene0064328 Unigene0045590 Unigene0072006
GO:0016829	lyase activity	MF	0.0155634	0.318448	Unigene0052315	Unigene0003943 Unigene0063658 Unigene0012164
GO:0005840	ribosome	CC	0.0168694	0.318448	Unigene0036636 Unigene0035959 Unigene0065241 Unigene0035780 Unigene0045590 Unigene0072006
GO:0003735	structural constituent of ribosome	MF	0.0177003	0.318448	Unigene0036636 Unigene0035959 Unigene0065241 Unigene0035780 Unigene0045590 Unigene0072006
GO:0004019	adenylosuccinate synthase activity	MF	0.0222991	0.318448		Unigene0059582
GO:0006672	ceramide metabolic process	BP	0.0222991	0.318448	Unigene0055579
GO:0004609	phosphatidylserine decarboxylase activity	MF	0.0222991	0.318448	Unigene0052315
GO:0006412	translation	BP	0.0316183	0.318448	Unigene0036636 Unigene0035959 Unigene0065241 Unigene0035780 Unigene0064328 Unigene0045590 Unigene0072006
GO:0006979	response to oxidative stress	BP	0.0374523	0.318448		Unigene0050520 Unigene0050586
GO:0016791	phosphatase activity	MF	0.0426052	0.318448		Unigene0044617 Unigene0010352
GO:0009415	response to water	BP	0.0441094	0.318448		Unigene0051222
GO:0004484	mRNA guanylyltransferase activity	MF	0.0441094	0.318448		Unigene0044617
GO:0006370	7-methylguanosine mRNA capping	BP	0.0441094	0.318448		Unigene0044617
GO:0004813	alanine-tRNA ligase activity	MF	0.0441094	0.318448	Unigene0064328
GO:0006419	alanyl-tRNA aminoacylation	BP	0.0441094	0.318448	Unigene0064328
GO:0004601	peroxidase activity	MF	0.0536432	0.378057		Unigene0050520 Unigene0050586
GO:0010467	gene expression	BP	0.0594471	0.396107	Unigene0036636 Unigene0035959 Unigene0065241 Unigene0035780 Unigene0064328 Unigene0045590 Unigene0072006	Unigene0044617
GO:0033897	ribonuclease T2 activity	MF	0.0654413	0.396107		Unigene0043921
GO:0008138	protein tyrosine/serine/threonine phosphatase activity	MF	0.0654413	0.396107		Unigene0044617
GO:0044271	cellular nitrogen compound biosynthetic process	BP	0.0699238	0.413949	Unigene0036636 Unigene0035959 Unigene0065241 Unigene0035780 Unigene0064328 Unigene0045590 Unigene0072006	Unigene0059582
GO:0008171	O-methyltransferase activity	MF	0.0863052	0.448181		Unigene0049382
GO:0006470	protein dephosphorylation	BP	0.0863052	0.448181		Unigene0044617
GO:0008654	phospholipid biosynthetic process	BP	0.0863052	0.448181	Unigene0052315
GO:0006629	lipid metabolic process	BP	0.0898667	0.45863	Unigene0055579 Unigene0052315	Unigene0000649
GO:0009055	electron carrier activity	MF	0.135395	0.626204	Unigene0079035	Unigene0006158
GO:0016788	hydrolase activity, acting on ester bonds	MF	0.137598	0.626598		Unigene0043921 Unigene0044617 Unigene0010352
GO:0044255	cellular lipid metabolic process	BP	0.143074	0.636176	Unigene0055579 Unigene0052315
GO:1901566	organonitrogen compound biosynthetic process	BP	0.143999	0.636176	Unigene0036636 Unigene0035959 Unigene0065241 Unigene0035780 Unigene0064328 Unigene0045590 Unigene0072006	Unigene0059582
GO:0005506	iron ion binding	MF	0.150845	0.656621	Unigene0010241	Unigene0050964
GO:0090407	organophosphate biosynthetic process	BP	0.174633	0.728046	Unigene0052315	Unigene0059582
GO:0012511	monolayer-surrounded lipid storage body	CC	0.18395	0.735801		Unigene0037206
GO:0006950	response to stress	BP	0.186443	0.735828		Unigene0050520 Unigene0051222 Unigene0050586
GO:1901564	organonitrogen compound metabolic process	BP	0.192736	0.750654	Unigene0024535 Unigene0036636 Unigene0035959 Unigene0055579 Unigene0065241 Unigene0035780 Unigene0064328 Unigene0045590 Unigene0072006	Unigene0059582
GO:0034641	cellular nitrogen compound metabolic process	BP	0.198781	0.75765	Unigene0024535 Unigene0036636 Unigene0035959 Unigene0055579 Unigene0065241 Unigene0035780 Unigene0064328 Unigene0045590 Unigene0072006	Unigene0059582 Unigene0044617
GO:0045735	nutrient reservoir activity	MF	0.202211	0.75765	Unigene0060564
GO:0003993	acid phosphatase activity	MF	0.202211	0.75765		Unigene0010352
GO:0000786	nucleosome	CC	0.220069	0.784825		Unigene0049278
GO:0019637	organophosphate metabolic process	BP	0.257281	0.849027	Unigene0024535 Unigene0052315	Unigene0059582
GO:0046983	protein dimerization activity	MF	0.271321	0.860067		Unigene0049382
GO:0006334	nucleosome assembly	BP	0.287658	0.860067		Unigene0049278
GO:0046914	transition metal ion binding	MF	0.299112	0.885371	Unigene0039958 Unigene0010241	Unigene0034198 Unigene0050964
GO:0046872	metal ion binding	MF	0.335241	0.913074	Unigene0003214 Unigene0039958 Unigene0010241	Unigene0034198 Unigene0035389 Unigene0050964 Unigene0010352
GO:0044249	cellular biosynthetic process	BP	0.350479	0.913074	Unigene0036636 Unigene0035959 Unigene0065241 Unigene0035780 Unigene0052315 Unigene0064328 Unigene0045590 Unigene0072006	Unigene0059582
GO:0006163	purine nucleotide metabolic process	BP	0.356802	0.913074	Unigene0024535	Unigene0059582
GO:0050896	response to stimulus	BP	0.358973	0.913074	Unigene0039209	Unigene0050520 Unigene0051222 Unigene0050586
GO:1901576	organic substance biosynthetic process	BP	0.373398	0.913074	Unigene0036636 Unigene0035959 Unigene0065241 Unigene0035780 Unigene0052315 Unigene0064328 Unigene0045590 Unigene0072006	Unigene0059582
GO:0044267	cellular protein metabolic process	BP	0.373398	0.913074	Unigene0036636 Unigene0035959 Unigene0065241 Unigene0035780 Unigene0064328 Unigene0045590 Unigene0072006	Unigene0044617 Unigene0020468
GO:0006796	phosphate-containing compound metabolic process	BP	0.380928	0.913074	Unigene0024535 Unigene0052315	Unigene0059582 Unigene0044617 Unigene0020468
GO:0016874	ligase activity	MF	0.38116	0.913074	Unigene0064328	Unigene0059582
GO:0008270	zinc ion binding	MF	0.397193	0.917018	Unigene0039958	Unigene0034198
GO:0006164	purine nucleotide biosynthetic process	BP	0.419387	0.917018		Unigene0059582
GO:0003924	GTPase activity	MF	0.432455	0.917018		Unigene0034755
GO:0005525	GTP binding	MF	0.433725	0.917018	Unigene0063008 Unigene0039209	Unigene0059582
GO:0015992	proton transport	BP	0.457729	0.934399	Unigene0024535
GO:0019538	protein metabolic process	BP	0.509442	0.948971	Unigene0036636 Unigene0035959 Unigene0065241 Unigene0035780 Unigene0064328 Unigene0045590 Unigene0072006	Unigene0062603 Unigene0044617 Unigene0020468
GO:0032991	macromolecular complex	CC	0.536528	0.948971	Unigene0036636 Unigene0035959 Unigene0065241 Unigene0035780 Unigene0045590 Unigene0072006	Unigene0049278
GO:0005737	cytoplasm	CC	0.551853	0.9497	Unigene0036636 Unigene0035959 Unigene0065241 Unigene0035780 Unigene0045590 Unigene0072006	Unigene0041736
GO:0006457	protein folding	BP	0.597061	0.998475		Unigene0041736
GO:0046034	ATP metabolic process	BP	0.615109	1	Unigene0024535
GO:0007264	small GTPase mediated signal transduction	BP	0.623833	1	Unigene0039209
GO:0016070	RNA metabolic process	BP	0.668731	1	Unigene0064328	Unigene0044617
GO:0044238	primary metabolic process	BP	0.800199	1	Unigene0024535 Unigene0013554 Unigene0036636 Unigene0035959 Unigene0055579 Unigene0065241 Unigene0035780 Unigene0052315 Unigene0064328 Unigene0045590 Unigene0072006 Unigene0047582	Unigene0062603 Unigene0059582 Unigene0044617 Unigene0000649 Unigene0020468
GO:0005622	intracellular	CC	0.80453	1	Unigene0002085 Unigene0036636 Unigene0035959 Unigene0065241 Unigene0035780 Unigene0045590 Unigene0072006	Unigene0037206 Unigene0049278 Unigene0041736
GO:0044424	intracellular part	CC	0.897136	1	Unigene0036636 Unigene0035959 Unigene0065241 Unigene0035780 Unigene0045590 Unigene0072006	Unigene0037206 Unigene0049278 Unigene0041736
GO:0097159	organic cyclic compound binding	MF	0.900109	1	Unigene0063008 Unigene0024535 Unigene0024647 Unigene0034295 Unigene0039209 Unigene0079035 Unigene0056897 Unigene0045768 Unigene0067445 Unigene0064328 Unigene0010241	Unigene0049278 Unigene0050520 Unigene0059582 Unigene0043921 Unigene0011452 Unigene0050964 Unigene0050586 Unigene0020468
GO:1901363	heterocyclic compound binding	MF	0.900109	1	Unigene0063008 Unigene0024535 Unigene0024647 Unigene0034295 Unigene0039209 Unigene0079035 Unigene0056897 Unigene0045768 Unigene0067445 Unigene0064328 Unigene0010241	Unigene0049278 Unigene0050520 Unigene0059582 Unigene0043921 Unigene0011452 Unigene0050964 Unigene0050586 Unigene0020468
GO:0044710	single-organism metabolic process	BP	1	1	Unigene0024535 Unigene0055579 Unigene0052315 Unigene0064328 Unigene0010241	Unigene0050520 Unigene0052630 Unigene0059582 Unigene0050964 Unigene0050586 Unigene0000649
GO:0044699	single-organism process	BP	1	1	Unigene0024535 Unigene0055579 Unigene0039209 Unigene0052315 Unigene0064328 Unigene0010241	Unigene0016537 Unigene0050520 Unigene0052630 Unigene0059582 Unigene0037631 Unigene0050964 Unigene0050586 Unigene0000649
GO:0016787	hydrolase activity	MF	1	1		Unigene0034755 Unigene0042638 Unigene0042637 Unigene0062603 Unigene0043921 Unigene0044617 Unigene0010352
GO:0044237	cellular metabolic process	BP	1	1	Unigene0024535 Unigene0036636 Unigene0035959 Unigene0000296 Unigene0055579 Unigene0065241 Unigene0035780 Unigene0052315 Unigene0064328 Unigene0045590 Unigene0072006	Unigene0059582 Unigene0044617 Unigene0020468
GO:0071704	organic substance metabolic process	BP	1	1	Unigene0024535 Unigene0013554 Unigene0036636 Unigene0035959 Unigene0055579 Unigene0065241 Unigene0035780 Unigene0052315 Unigene0064328 Unigene0045590 Unigene0072006 Unigene0047582	Unigene0062603 Unigene0059582 Unigene0044617 Unigene0000649 Unigene0020468
Note: GO_ID : GO identification number; GO_Term:Description of the GO identifier function；GO_Class：GO Category (MF,CC,BP)；Pvalue:Pvalue of enrichment analysis; AdjustedPv:corrected Pvalue.
							Up_Prot_names	Down_Prot_names
