# Supplementary material for: TMT-based proteomic analysis of the causes of reduced seed viability in Allium mongolicum under accelerated aging
Source: Research Square preprint supplement (doi:10.21203/rs.3.rs-2216220/v1), 2022-11-29
Supplement: Supplementary file 2 [file 91bba607e31d33290b43d9bc.xlsx]

## Sheet: Sheet1
List of some important DEPs
Protein	Description	CK_1	CK_2	CK_3	T1_1	T1_2	T1_3	T4_1	T4_2	T4_3
Unigene0049013	42 1517 aldehyde dehydrogenase family 2 member C4-like [Asparagus officinalis]	3637	3757.3	3726.8	2880	2749.3	2732.4	2570.7	2499.3	2399.8
Unigene0047137	143 718 minus strand PREDICTED: NAD(P)H dehydrogenase (quinone) FQR1 [Phoenix dactylifera]	3031.4	2958.4	3032.6	2275.1	2273.7	2278.9	2268.2	2294.1	2227
Unigene0049278	13 369 Histone H1.2, partial [Anthurium amnicola]	287.4	279.7	294.7	492.1	469	523.6	119.1	124.4	85.3
Unigene0006910	1 297 glutathione S-transferase U8-like [Asparagus officinalis]	3404.5	3392	3332.6	1721.2	1694	1546.1	1179.7	1146	1092.8
Unigene0045869	357 1226 tetraketide alpha-pyrone reductase 1-like isoform X3 [Asparagus officinalis]	2441.5	2532.7	2427.3	1356.3	1266.1	1215.5	1054.7	1021.6	998.5
Unigene0000863	8 568 probable glutathione S-transferase [Asparagus officinalis]	1079.6	987.2	1035.1	580.8	566.8	534.4	475.9	495.6	461.9
Unigene0051938	13 690 minus strand PREDICTED: glutathione S-transferase U17-like [Phoenix dactylifera]	1224.1	1215.8	1193.5	708.6	708.8	686.4	627.2	650	614.4
Unigene0005112	4 222 inhibitor of trypsin and hageman factor-like isoform X2 [Asparagus officinalis]	845.3	851.3	824.7	606.7	595.5	573.9	549.4	525.5	517.7
Unigene0053605	20 937 minus strand isoflavone reductase-like protein [Asparagus officinalis]	564.3	565	565.1	425	418.8	390	384.2	385	390.5
Unigene0060546	69 2420 minus strand ATP-dependent RNA helicase-like protein DB10 [Asparagus officinalis]	267.1	275.7	291.9	368.9	374.5	384.5	429.5	471.9	518.9
Unigene0042879	25 225 minus strand PREDICTED: defensin Ec-AMP-D2 [Vitis vinifera]	128.5	123.1	124.2	179.5	184.5	186.9	92.7	90	80.4
Unigene0003044	52 840 minus strand prostaglandin reductase-3 [Asparagus officinalis]	295.5	294.2	304.8	484.5	438.9	452.3	398.2	415.5	421.4
Unigene0048082	54 1400 aladin isoform X2 [Asparagus officinalis]	807.7	801.9	809	1056.7	1100.4	1083.9	1097	1062.3	1084.9
Unigene0042292	103 756 PREDICTED: vacuolar protein sorting-associated protein 32 homolog 2 [Cucumis melo]	120.2	116.5	120.1	91.2	84	91.3	88.8	81.6	98.9
Unigene0047075	1411 1818 PREDICTED: polyadenylate-binding protein-interacting protein 11 [Oryza brachyantha]	330.9	341.3	332.1	219.8	236.6	222	244.8	229.8	234
Unigene0053916	228 3032 minus strand LOW QUALITY PROTEIN: receptor protein kinase TMK1-like [Asparagus officinalis]	135.2	127.4	140.1	97.8	105.8	91.5	92.8	85.5	90.4
Unigene0042829	4 1065 minus strand trans-resveratrol di-O-methyltransferase-like isoform X2 [Asparagus officinalis]	133.7	143	136.1	188	190.2	185.3	189.7	177.8	196.3
Unigene0011542	48 368 oleosin S1-2 [Asparagus officinalis]	689	694.5	682.1	527.9	529.2	500.7	461.3	471.3	469.8
Unigene0008772	347 2212 beta-D-glucan exohydolase [Elaeis guineensis]	41.1	35.6	37.8	54	50.5	59.3	55.4	54.1	53.6
Unigene0045171	71 1132 mitogen-activated protein kinase kinase 1 isoform X1 [Asparagus officinalis]	344.6	354.3	351.3	231.8	241.3	221.5	245.2	232.1	246
Unigene0010352	95 1984 LOW QUALITY PROTEIN: probable inactive purple acid phosphatase 2 [Asparagus officinalis]	294.8	284.1	301	147.9	133.7	128.3	83.1	96.8	102.4
