# Supplementary material for: TMT-based proteomic analysis of the causes of reduced seed viability in Allium mongolicum under accelerated aging
Source: Research Square preprint supplement (doi:10.21203/rs.3.rs-2216220/v1), 2022-11-29
Supplement: Supplementary file 3 [file e476df35abd4935f9a910a4c.xlsx]

## Sheet: T1.vs.CK.
KEGG enrichment of differential proteins in ‘T1 vs CK’ group
MapID	MapTitle	Pvalue	AdjustedPv	ProtID	Description
map00480	Glutathione metabolism	0.0106168	0.222953	Unigene0006910 Unigene0000863 Unigene0051938	1 297 glutathione S-transferase U8-like [Asparagus officinalis], 8 568 probable glutathione S-transferase [Asparagus officinalis], 13 690 minus strand PREDICTED: glutathione S-transferase U17-like [Phoenix dactylifera]
map00940	Phenylpropanoid biosynthesis	0.0257585	0.270465	Unigene0049013 Unigene0008772	42 1517 aldehyde dehydrogenase family 2 member C4-like [Asparagus officinalis], 347 2212 beta-D-glucan exohydolase [Elaeis guineensis]
map01212	Fatty acid metabolism	0.0480662	0.336463	Unigene0064779 Unigene0059120	283 7044 minus strand acetyl-CoA carboxylase 1-like [Asparagus officinalis], 122 1264 minus strand delta(12)-fatty-acid desaturase FAD2-like [Asparagus officinalis]
map00130	Ubiquinone and other terpenoid-quinone biosynthesis	0.113447	0.357365	Unigene0047137	143 718 minus strand PREDICTED: NAD(P)H dehydrogenase (quinone) FQR1 [Phoenix dactylifera]
map00460	Cyanoamino acid metabolism	0.121072	0.357365	Unigene0008772	347 2212 beta-D-glucan exohydolase [Elaeis guineensis]
map04130	SNARE interactions in vesicular transport	0.128636	0.357365	Unigene0001955	134 796 vesicle-associated membrane protein 714 [Asparagus officinalis]
map01040	Biosynthesis of unsaturated fatty acids	0.136139	0.357365	Unigene0059120	122 1264 minus strand delta(12)-fatty-acid desaturase FAD2-like [Asparagus officinalis]
map00061	Fatty acid biosynthesis	0.19403	0.422112	Unigene0064779	283 7044 minus strand acetyl-CoA carboxylase 1-like [Asparagus officinalis]
map00640	Propanoate metabolism	0.201006	0.422112	Unigene0064779	283 7044 minus strand acetyl-CoA carboxylase 1-like [Asparagus officinalis]
map04626	Plant-pathogen interaction	0.261303	0.489395	Unigene0045171	71 1132 mitogen-activated protein kinase kinase 1 isoform X1 [Asparagus officinalis]
map03040	Spliceosome	0.279654	0.489395	Unigene0060546 Unigene0042522	69 2420 minus strand ATP-dependent RNA helicase-like protein DB10 [Asparagus officinalis], 96 356 minus strand BnaC04g28790D [Brassica napus]
map00500	Starch and sucrose metabolism	0.340938	0.550746	Unigene0008772	347 2212 beta-D-glucan exohydolase [Elaeis guineensis]
map03018	RNA degradation	0.396662	0.56278	Unigene0009903	3 827 enolase, partial [Solanum lycopersicum]
map00620	Pyruvate metabolism	0.401985	0.56278	Unigene0064779	283 7044 minus strand acetyl-CoA carboxylase 1-like [Asparagus officinalis]
map04144	Endocytosis	0.472059	0.619577	Unigene0042292	103 756 PREDICTED: vacuolar protein sorting-associated protein 32 homolog 2 [Cucumis melo]
map00010	Glycolysis / Gluconeogenesis	0.525943	0.649694	Unigene0009903	3 827 enolase, partial [Solanum lycopersicum]
map03013	RNA transport	0.600875	0.701021	Unigene0048082	54 1400 aladin isoform X2 [Asparagus officinalis]
map01110	Biosynthesis of secondary metabolites	0.756219	0.835821	Unigene0047137 Unigene0064779 Unigene0009903 Unigene0008772	143 718 minus strand PREDICTED: NAD(P)H dehydrogenase (quinone) FQR1 [Phoenix dactylifera], 283 7044 minus strand acetyl-CoA carboxylase 1-like [Asparagus officinalis], 3 827 enolase, partial [Solanum lycopersicum], 347 2212 beta-D-glucan exohydolase [Elaeis guineensis]
Note: MapID：ID of the enriched KEGG PATHWAY；MapTitle:Name of enrichment of KEGG PATHWAY; Pvalue:Pvalue of enrichment analysis; AdjustedPv:corrected Pvalue; ProtID:Enriched protein list.

## Sheet: T4.vs.CK.
KEGG enrichment of differential proteins in ‘T4 vs CK’ group
MapID	MapTitle	Pvalue	AdjustedPv	ProtID	Description
map00480	Glutathione metabolism	0.00427616	0.119284	Unigene0006910 Unigene0050520 Unigene0000863 Unigene0051938 Unigene0048604 Unigene0000890	1 297 glutathione S-transferase U8-like [Asparagus officinalis], 1825 2214 minus strand ascorbate peroxidase [Camellia azalea], 8 568 probable glutathione S-transferase [Asparagus officinalis], 13 690 minus strand PREDICTED: glutathione S-transferase U17-like [Phoenix dactylifera], 2 244 glutathione S-transferase [Dracaena cambodiana], 12 272 minus strand PREDICTED: glutathione S-transferase U17-…
map03040	Spliceosome	0.00611713	0.119284	Unigene0053814 Unigene0053330 Unigene0012133 Unigene0024647 Unigene0060546 Unigene0040713 Unigene0011562 Unigene0045768 Unigene0008843	133 2070 heat shock protein 70-2 [Nicotiana tabacum], 76 1494 PREDICTED: LOW QUALITY PROTEIN: U4/U6 small nuclear ribonucleoprotein PRP4-like protein [Elaeis guineensis], 1 147 minus strand heat shock protein 70 [Petunia x hybrida], 35 787 splicing factor 3B subunit 4 [Asparagus officinalis], 69 2420 minus strand ATP-dependent RNA helicase-like protein DB10 [Asparagus officinalis], 44 427 minus s…
map00940	Phenylpropanoid biosynthesis	0.00919882	0.119585	Unigene0049013 Unigene0043621 Unigene0050586 Unigene0008772	42 1517 aldehyde dehydrogenase family 2 member C4-like [Asparagus officinalis], 83 1135 minus strand probable mannitol dehydrogenase [Asparagus officinalis], 337 1254 PREDICTED: peroxidase 31 [Phoenix dactylifera], 347 2212 beta-D-glucan exohydolase [Elaeis guineensis]
map00073	Cutin, suberine and wax biosynthesis	0.134489	0.657733	Unigene0036468	50 739 pollen caleosin [Lilium longiflorum]
map00500	Starch and sucrose metabolism	0.153712	0.657733	Unigene0063235 Unigene0000950 Unigene0008772	263 2710 minus strand sucrose synthase [Ornithogalum longebracteatum], 7 1707 minus strand beta-fructofuranosidase, insoluble isoenzyme 3-like [Asparagus officinalis], 347 2212 beta-D-glucan exohydolase [Elaeis guineensis]
map00053	Ascorbate and aldarate metabolism	0.16749	0.657733	Unigene0050520 Unigene0048604	1825 2214 minus strand ascorbate peroxidase [Camellia azalea], 2 244 glutathione S-transferase [Dracaena cambodiana]
map00565	Ether lipid metabolism	0.183172	0.657733	Unigene0054663	51 1436 lysophospholipid acyltransferase 1-like [Asparagus officinalis]
map03013	RNA transport	0.214979	0.657733	Unigene0063008 Unigene0056408 Unigene0048082 Unigene0000296 Unigene0039209	3 1301 minus strand Elongation factor 1-alpha [Anthurium amnicola], 443 4072 nuclear pore complex protein NUP133 [Asparagus officinalis], 54 1400 aladin isoform X2 [Asparagus officinalis], 200 2050 translation initiation factor eIF-2B subunit delta-like [Asparagus officinalis], 16 651 minus strand GTP-binding nuclear protein spi1 [Anthurium amnicola]
map03008	Ribosome biogenesis in eukaryotes	0.262381	0.657733	Unigene0040713 Unigene0039209	44 427 minus strand PREDICTED: NHP2-like protein 1 [Daucus carota subsp. sativus] [Daucus carota], 16 651 minus strand GTP-binding nuclear protein spi1 [Anthurium amnicola]
map04626	Plant-pathogen interaction	0.262381	0.657733	Unigene0034604 Unigene0045171	11 508 pathogenesis-related protein 1 [Allium sativum], 71 1132 mitogen-activated protein kinase kinase 1 isoform X1 [Asparagus officinalis]
map03010	Ribosome	0.270199	0.657733	Unigene0036636 Unigene0035959 Unigene0065241 Unigene0035780 Unigene0038074 Unigene0045590	29 658 60S ribosomal protein L10-A [Anthurium amnicola], 3 452 minus strand BnaA04g01110D [Brassica napus], 75 812 minus strand 40S ribosomal protein S3A [Klebsormidium flaccidum], 132 989 minus strand 50S ribosomal protein L3-2, chloroplastic-like [Asparagus officinalis], 53 793 minus strand 60S ribosomal protein L7, partial [Anthurium amnicola], 2 403 40S ribosomal protein S16 [Anthurium amnico…
map00600	Sphingolipid metabolism	0.272623	0.657733	Unigene0055579	167 934 minus strand PREDICTED: alkaline ceramidase 3 [Musa acuminata subsp. malaccensis] [Musa acuminata]
map00290	Valine, leucine and isoleucine biosynthesis	0.293441	0.657733	Unigene0055248	222 1796 minus strand ketol-acid reductoisomerase, chloroplastic [Asparagus officinalis]
map00130	Ubiquinone and other terpenoid-quinone biosynthesis	0.33334	0.657733	Unigene0047137	143 718 minus strand PREDICTED: NAD(P)H dehydrogenase (quinone) FQR1 [Phoenix dactylifera]
map00460	Cyanoamino acid metabolism	0.352453	0.657733	Unigene0008772	347 2212 beta-D-glucan exohydolase [Elaeis guineensis]
map00770	Pantothenate and CoA biosynthesis	0.371029	0.657733	Unigene0055248	222 1796 minus strand ketol-acid reductoisomerase, chloroplastic [Asparagus officinalis]
map00920	Sulfur metabolism	0.371029	0.657733	Unigene0079035	72 395 mitochondrial cytochrome c [Stellaria longipes]
map04075	Plant hormone signal transduction	0.371029	0.657733	Unigene0034604	11 508 pathogenesis-related protein 1 [Allium sativum]
map04144	Endocytosis	0.460798	0.752601	Unigene0053814 Unigene0012133 Unigene0042292	133 2070 heat shock protein 70-2 [Nicotiana tabacum], 1 147 minus strand heat shock protein 70 [Petunia x hybrida], 103 756 PREDICTED: vacuolar protein sorting-associated protein 32 homolog 2 [Cucumis melo]
map00410	beta-Alanine metabolism	0.501986	0.752601	Unigene0013829	186 1337 PREDICTED: 3-hydroxyisobutyryl-CoA hydrolase-like protein 5 [Elaeis guineensis]
map00564	Glycerophospholipid metabolism	0.516346	0.752601	Unigene0054663	51 1436 lysophospholipid acyltransferase 1-like [Asparagus officinalis]
map00640	Propanoate metabolism	0.5303	0.752601	Unigene0013829	186 1337 PREDICTED: 3-hydroxyisobutyryl-CoA hydrolase-like protein 5 [Elaeis guineensis]
map04016	MAPK signaling pathway - plant	0.54386	0.752601	Unigene0034604	11 508 pathogenesis-related protein 1 [Allium sativum]
map00052	Galactose metabolism	0.557035	0.752601	Unigene0000950	7 1707 minus strand beta-fructofuranosidase, insoluble isoenzyme 3-like [Asparagus officinalis]
map00561	Glycerolipid metabolism	0.569838	0.752601	Unigene0054663	51 1436 lysophospholipid acyltransferase 1-like [Asparagus officinalis]
map00970	Aminoacyl-tRNA biosynthesis	0.582278	0.752601	Unigene0064328	633 3215 minus strand PREDICTED: probable alanine--tRNA ligase, chloroplastic isoform X6 [Populus euphratica]
map00280	Valine, leucine and isoleucine degradation	0.606108	0.752601	Unigene0013829	186 1337 PREDICTED: 3-hydroxyisobutyryl-CoA hydrolase-like protein 5 [Elaeis guineensis]
map00250	Alanine, aspartate and glutamate metabolism	0.617519	0.752601	Unigene0059582	478 1761 minus strand adenylosuccinate synthetase 2, chloroplastic-like [Asparagus officinalis]
Note: MapID：ID of the enriched KEGG PATHWAY；MapTitle:Name of enrichment of KEGG PATHWAY; Pvalue:Pvalue of enrichment analysis; AdjustedPv:corrected Pvalue; ProtID:Enriched protein list.

## Sheet: T4.vs.T1.
KEGG enrichment of differential proteins in ‘T4 vs T1’ group
MapID	MapTitle	Pvalue	AdjustedPv	ProtID	Description
map03010	Ribosome	0.00751845	0.248109	Unigene0013260 Unigene0036636 Unigene0035959 Unigene0065241 Unigene0035780 Unigene0038074 Unigene0045590 Unigene0072006	38 364 PREDICTED: 60S acidic ribosomal protein P1-like [Ziziphus jujuba], 29 658 60S ribosomal protein L10-A [Anthurium amnicola], 3 452 minus strand BnaA04g01110D [Brassica napus], 75 812 minus strand 40S ribosomal protein S3A [Klebsormidium flaccidum], 132 989 minus strand 50S ribosomal protein L3-2, chloroplastic-like [Asparagus officinalis], 53 793 minus strand 60S ribosomal protein L7, parti…
map00480	Glutathione metabolism	0.0331764	0.54741	Unigene0006910 Unigene0050520 Unigene0048604 Unigene0037350	1 297 glutathione S-transferase U8-like [Asparagus officinalis], 1825 2214 minus strand ascorbate peroxidase [Camellia azalea], 2 244 glutathione S-transferase [Dracaena cambodiana], 12 737 glutathione S-transferase [Dracaena cambodiana]
map00564	Glycerophospholipid metabolism	0.104492	0.686689	Unigene0054663 Unigene0052315	51 1436 lysophospholipid acyltransferase 1-like [Asparagus officinalis], 1296 2252 minus strand phosphatidylserine decarboxylase proenzyme 2-like isoform X2 [Asparagus officinalis]
map00053	Ascorbate and aldarate metabolism	0.111663	0.686689	Unigene0050520 Unigene0048604	1825 2214 minus strand ascorbate peroxidase [Camellia azalea], 2 244 glutathione S-transferase [Dracaena cambodiana]
map00565	Ether lipid metabolism	0.145561	0.686689	Unigene0054663	51 1436 lysophospholipid acyltransferase 1-like [Asparagus officinalis]
map03008	Ribosome biogenesis in eukaryotes	0.18094	0.686689	Unigene0040713 Unigene0039209	44 427 minus strand PREDICTED: NHP2-like protein 1 [Daucus carota subsp. sativus] [Daucus carota], 16 651 minus strand GTP-binding nuclear protein spi1 [Anthurium amnicola]
map03040	Spliceosome	0.187279	0.686689	Unigene0053814 Unigene0024647 Unigene0040713 Unigene0045768 Unigene0008843	133 2070 heat shock protein 70-2 [Nicotiana tabacum], 35 787 splicing factor 3B subunit 4 [Asparagus officinalis], 44 427 minus strand PREDICTED: NHP2-like protein 1 [Daucus carota subsp. sativus] [Daucus carota], 792 1433 PREDICTED: serine/arginine-rich splicing factor SR34A-like isoform X2 [Phoenix dactylifera], 217 1053 minus strand PREDICTED: splicing factor 3A subunit 2-like [Nicotiana sylve…
map00600	Sphingolipid metabolism	0.21924	0.713447	Unigene0055579	167 934 minus strand PREDICTED: alkaline ceramidase 3 [Musa acuminata subsp. malaccensis] [Musa acuminata]
map00960	Tropane, piperidine and pyridine alkaloid biosynthesis	0.270399	0.713447	Unigene0061087	57 836 minus strand tropinone reductase homolog At2g29290-like [Asparagus officinalis]
map00920	Sulfur metabolism	0.302675	0.713447	Unigene0079035	72 395 mitochondrial cytochrome c [Stellaria longipes]
map04075	Plant hormone signal transduction	0.302675	0.713447	Unigene0034604	11 508 pathogenesis-related protein 1 [Allium sativum]
map03018	RNA degradation	0.371174	0.748975	Unigene0009903 Unigene0067445	3 827 enolase, partial [Solanum lycopersicum], 230 1837 minus strand Heat shock protein 60, mitochondrial [Anthurium amnicola]
map04016	MAPK signaling pathway - plant	0.45681	0.748975	Unigene0034604	11 508 pathogenesis-related protein 1 [Allium sativum]
map00052	Galactose metabolism	0.469048	0.748975	Unigene0000950	7 1707 minus strand beta-fructofuranosidase, insoluble isoenzyme 3-like [Asparagus officinalis]
map00561	Glycerolipid metabolism	0.481018	0.748975	Unigene0054663	51 1436 lysophospholipid acyltransferase 1-like [Asparagus officinalis]
map00940	Phenylpropanoid biosynthesis	0.492724	0.748975	Unigene0050586	337 1254 PREDICTED: peroxidase 31 [Phoenix dactylifera]
map00970	Aminoacyl-tRNA biosynthesis	0.492724	0.748975	Unigene0064328	633 3215 minus strand PREDICTED: probable alanine--tRNA ligase, chloroplastic isoform X6 [Populus euphratica]
map03013	RNA transport	0.499316	0.748975	Unigene0063008 Unigene0000296 Unigene0039209	3 1301 minus strand Elongation factor 1-alpha [Anthurium amnicola], 200 2050 translation initiation factor eIF-2B subunit delta-like [Asparagus officinalis], 16 651 minus strand GTP-binding nuclear protein spi1 [Anthurium amnicola]
map00250	Alanine, aspartate and glutamate metabolism	0.526321	0.752817	Unigene0059582	478 1761 minus strand adenylosuccinate synthetase 2, chloroplastic-like [Asparagus officinalis]
map04626	Plant-pathogen interaction	0.547503	0.752817	Unigene0034604	11 508 pathogenesis-related protein 1 [Allium sativum]
map04145	Phagosome	0.596502	0.787383	Unigene0034755	41 1378 Tubulin [Corchorus capsularis]
map00190	Oxidative phosphorylation	0.684458	0.868735	Unigene0024535 Unigene0014462	141 1556 ATP synthase subunit beta, mitochondrial [Anthurium amnicola], 91 417 NADH dehydrogenase [ubiquinone] 1 alpha subcomplex subunit 8-B-like [Asparagus officinalis]
Note: MapID：ID of the enriched KEGG PATHWAY；MapTitle:Name of enrichment of KEGG PATHWAY; Pvalue:Pvalue of enrichment analysis; AdjustedPv:corrected Pvalue; ProtID:Enriched protein list.
